# Supplementary material for: Staff and Institutional Factors Associated with Substandard Care in the Management of Postpartum Hemorrhage
Source: PubMed Central journal article supplement (PMC4806984; doi:10.1371/journal.pone.0151998), 2016-03-24
Supplement: pone.0151998.s001.pdf [file pone.0151998.s001.pdf]

## Vignette 1

**Despite your actions, bleeding persists. Uterus is hypotonic**

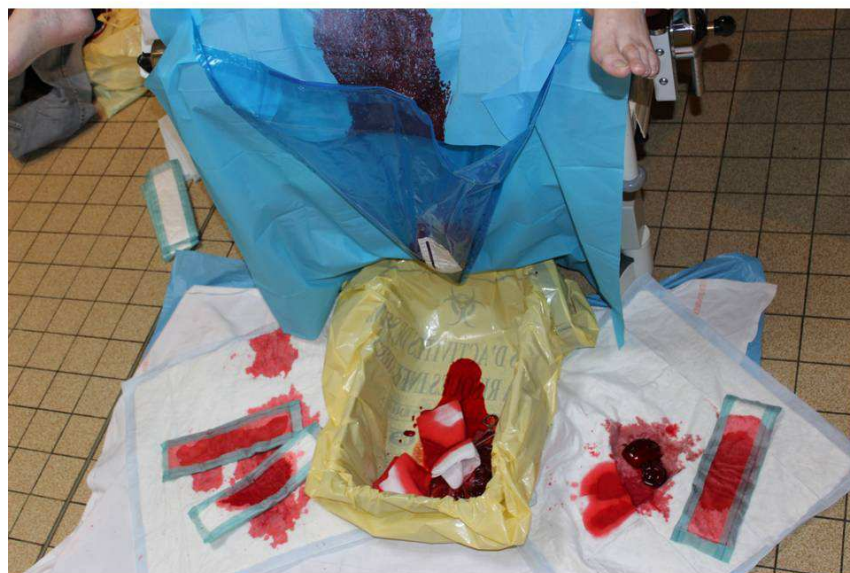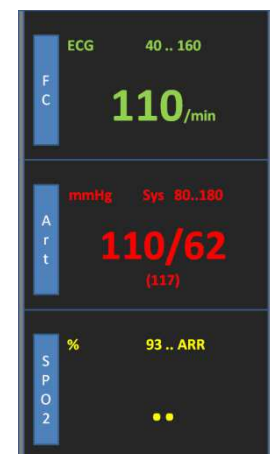

What measures would you perform **within the next 15 minutes** ?

## Vignette 1

**30 minutes later, despite your actions, bleedings persists. The uterus is hypotonic when you stop the uterine massage. The patient does not feel very well and is dizzy.**

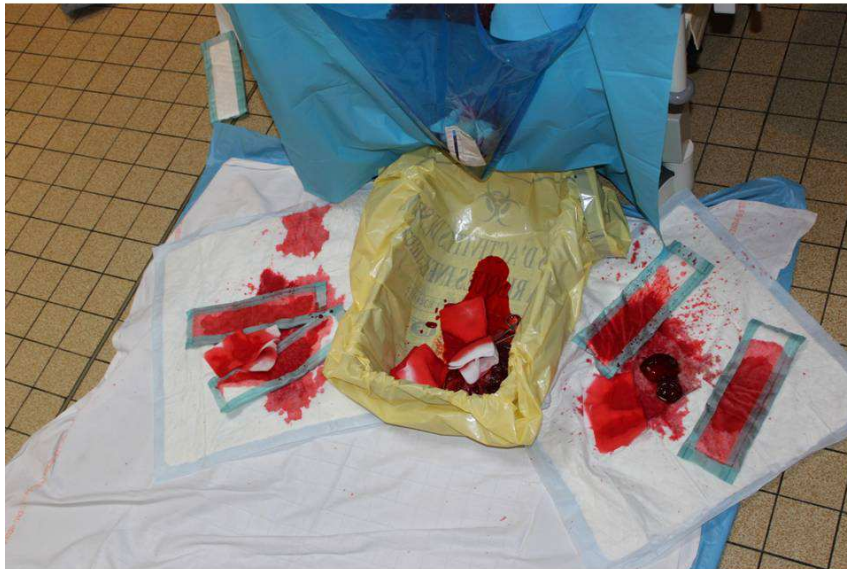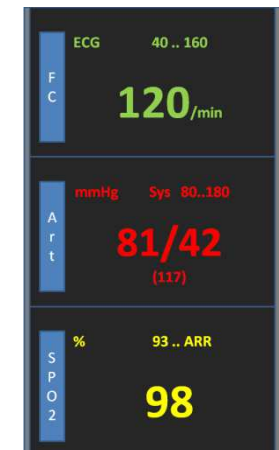

What measures you propose at this stage ?
