# Supplementary material for: Staff and Institutional Factors Associated with Substandard Care in the Management of Postpartum Hemorrhage
Source: PubMed Central journal article supplement (PMC4806984; doi:10.1371/journal.pone.0151998), 2016-03-24
Supplement: pone.0151998.s002.pdf [file pone.0151998.s002.pdf]

# Vignette 2

|                                                                    |                   |                                |                      |                      |                      |                      |                         |
|--------------------------------------------------------------------|-------------------|--------------------------------|----------------------|----------------------|----------------------|----------------------|-------------------------|
|                                                                    | Age : 31years     | Course of pregnancy uneventful |                      |                      |                      |                      |                         |
|                                                                    | Gravida 1         |                                |                      |                      |                      |                      |                         |
|                                                                    | Origin : Moroccan | Term : 40 weeks of gestation   |                      |                      |                      |                      |                         |
|                                                                    | BMI : 23          | Spontaneous labor              |                      |                      |                      |                      |                         |
| Pre-operative blood test : haemoglobin: 13.1g/dL, platelet: 178G/L |                   |                                |                      |                      |                      |                      |                         |
| Heure                                                              |                   | 8:00 PM                        | 9:00 PM              | 10:00 PM             | 11:00 PM             | 12:00 AM             | 1:00 AM                 |
| Cervix                                                             | 10                |                                |                      |                      |                      |                      |                         |
|                                                                    | 9                 |                                |                      |                      |                      |                      |                         |
|                                                                    | 8                 |                                |                      |                      |                      |                      |                         |
| Descent of head                                                    | 7                 |                                |                      |                      |                      |                      |                         |
|                                                                    | 6                 |                                |                      |                      |                      |                      |                         |
|                                                                    | 5                 |                                |                      |                      |                      |                      |                         |
|                                                                    | 4                 |                                |                      |                      |                      |                      |                         |
|                                                                    | 3                 |                                |                      |                      |                      |                      |                         |
|                                                                    | 2                 |                                |                      |                      |                      |                      |                         |
|                                                                    | 1                 |                                |                      |                      |                      |                      |                         |
| fetal presentation                                                 |                   |                                |                      |                      |                      |                      |                         |
| ruptured membranes                                                 |                   |                                | Rupture of membranes | clear amniotic fluid | clear amniotic fluid | clear amniotic fluid | brown amniotic fluid    |
| fetal heart rate (FHR)                                             |                   | 140bpm                         | 140bpm               | 140bpm               | 140bpm               | 160bpm               | 160bpm                  |
| Frequency of Contractions                                          |                   | 4/10min                        | 3-4/10min            | 3-4/10min            | 3-4/10min            | 4/10min              | 4/10min                 |
| Constant BP                                                        | 12/7              | 12/7                           | 11/7                 | 11/7                 | 11/7                 |                      |                         |
| temp                                                               | 36,9              |                                |                      |                      |                      |                      |                         |
| Behavior                                                           |                   | Algic                          | Algic                | Calm                 | Calm                 | Calm                 | Calm                    |
| Treatment                                                          |                   |                                |                      | Oxytocine            |                      |                      | Bladder catheterization |

12:40 am : beginning of expulsive efforts  
 01:05 am : spontaneous vaginal delivery  
 boy weighting 3640g  
 Active 3rd stage of labor  
 Placenta delivered

minimal bleeding appears and stops with uterus massage  
 02:30 am : minimal bleeding persists, blood loss is estimated at 650mL

What measures would you perform **within the next 15 minutes** ?

## Vignette 2

**Despite your actions, bleeding persists in thin stream. The uterus is tonic.**

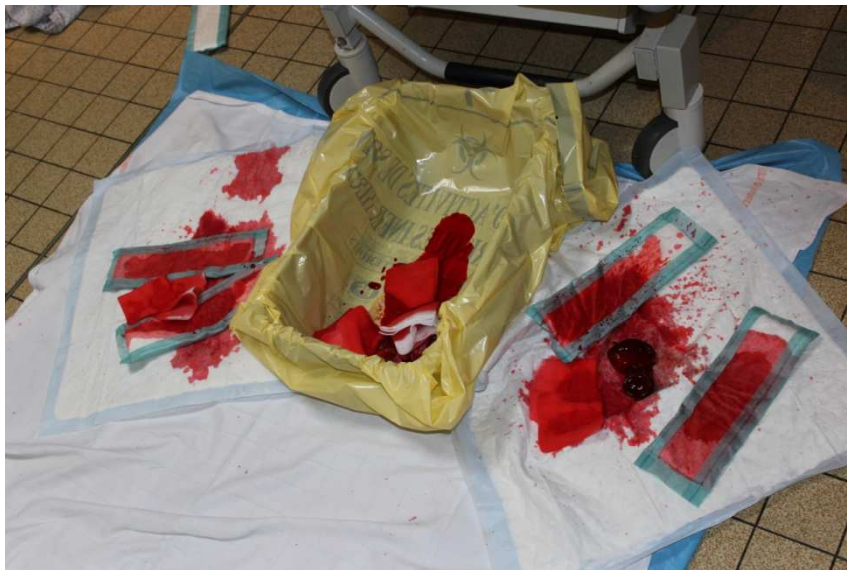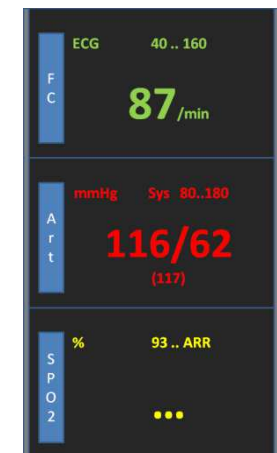

What measures would you perform **within the next 15 minutes** ?

## Vignette 2

**30 minutes later, despite your actions, bleeding is more abundant. The uterus is tonic.**

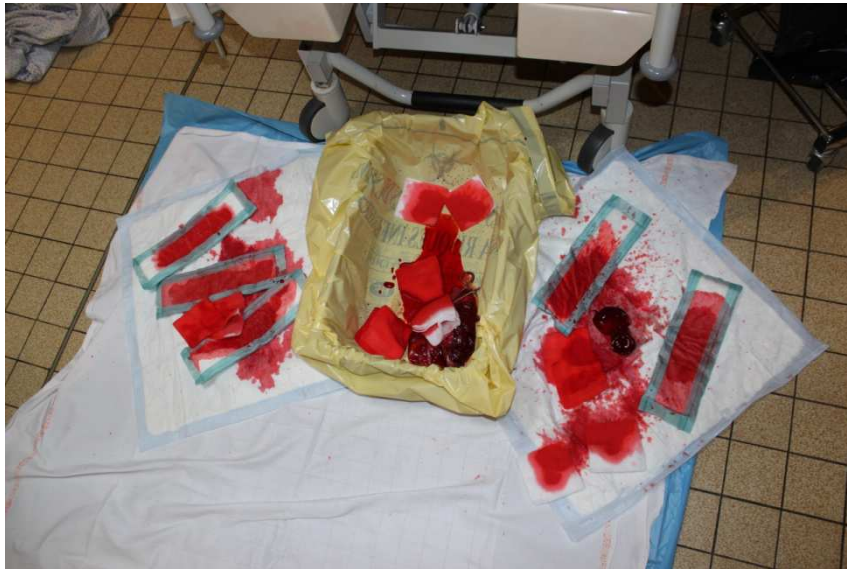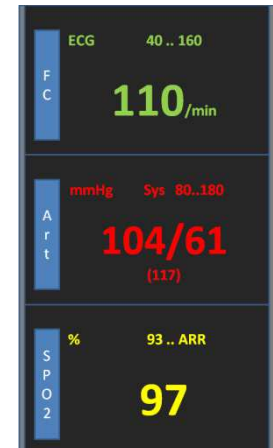

What measures you propose at this stage ?
