# Supplementary material for: Staff and Institutional Factors Associated with Substandard Care in the Management of Postpartum Hemorrhage
Source: PubMed Central journal article supplement (PMC4806984; doi:10.1371/journal.pone.0151998), 2016-03-24
Supplement: pone.0151998.s004.pdf [file pone.0151998.s004.pdf]

### **Pharmacological management**

- Antibiotic
- Cytotec® : misoprostol
  - per os             intrarectale
  - 50 µg             100 µg             200 µg
  - 400 µg            600 µg            800 µg
- Exacyl® : tranexamic acid intravenous
  - 500 mg                             1 g
  - 1.5 g                                 2 g
  - 2.5 g
- Methylergometrine intramuscular
  - 0.1 mg                               0.2 mg
- Nalador®: sulprostone intravenous for 1 h
  - 100 µg             200 µg             300 µg
  - 400 µg             500 µg             600 µg
- Syntocinon®: oxytocin
  - intravenous push (bolus):
    - 5 IU    10 IU    15 IU    20 IU
  - slow intravenous (1min):
    - 5 IU    10 IU    15 IU    20 IU
  - intravenous infusion:
    - 5 IU    10 IU    15 IU    20 IU
  - flow acceleration of the current infusion
- Other:
- None

### **Non-pharmacological management**

- Surgical treatment considered
- Bimanual uterine compression
- Manual examination of the uterine cavity
- Abdominal ultrasound
- Selective arterial embolization considered
- Uterine massage
- Cervical examination with speculum
- Perineal repair
- Bladder catheterization
- Intrauterine tamponade considered
- Torsion of the cervix
- Other:
- None

### **Communication, monitoring and investigation**

- Alert other member of the team
  - obstetric team
  - anesthesiology team
- Venipuncture for blood sampling
  - coagulation factors
  - liver function tests
  - hemostasis
  - serum electrolytes
  - blood counts including platelet counts
- Resuscitation
  - second intravenous access
  - monitoring
  - volume replacement
  - other :
- Other:
- None
